# Supplementary material for: Long noncoding RNAs are dynamically regulated during β-cell mass expansion in mouse pregnancy and control β-cell proliferation in vitro
Source: PubMed Central journal article supplement (PMC5552087; doi:10.1371/journal.pone.0182371), 2017-08-10
Supplement: pone.0182371.s005.pdf [file pone.0182371.s005.pdf]

**S5 Fig. Analyses of cell cell cycle genes after Lnc03 knock down.** MIN6 cells were transfected with siLnc03 or siCtr and subjected to 500ng/ml prolactin for 24h. Gene expression was normalized to siCtr treated cells. Differential gene expression was not enriched in any particular annotated group (Fisher's exact test).

**S5 Fig**

| Gene Symbol | Protein class                             | Fold change | P-Value | Significant P-Value | Relative change |
|-------------|-------------------------------------------|-------------|---------|---------------------|-----------------|
| Cdkn3       | G1 Phase & G1/S Transition                | -1.35       | 0.026   | ✓                   |                 |
| Myb         | G1 Phase & G1/S Transition                | -1.47       | 0.060   |                     |                 |
| Gpr132      | G1 Phase & G1/S Transition                | -1.16       | 0.110   |                     |                 |
| Slfn1       | G1 Phase & G1/S Transition                | -1.14       | 0.110   |                     |                 |
| Cdk6        | G1 Phase & G1/S Transition                | -1.06       | 0.112   |                     |                 |
| Itgb1       | G1 Phase & G1/S Transition                | -1.18       | 0.126   |                     |                 |
| Chek1       | G2 Phase & G2/M Transition                | -1.18       | 0.151   |                     |                 |
| Birc5       | G2 Phase & G2/M Transition                | -1.14       | 0.180   |                     |                 |
| Ppm1d       | G2 Phase & G2/M Transition                | -1.08       | 0.549   |                     |                 |
| Wee1        | M Phase                                   | 1.07        | 0.004   | ✓                   |                 |
| Cdc25c      | M Phase                                   | -1.25       | 0.005   | ✓                   |                 |
| Shc1        | M Phase                                   | -1.26       | 0.008   | ✓                   |                 |
| Cdc20       | M Phase                                   | -1.42       | 0.021   | ✓                   |                 |
| Ccna1       | M Phase                                   | -1.40       | 0.034   | ✓                   |                 |
| Terf1       | M Phase                                   | -1.18       | 0.075   |                     |                 |
| Cdk2        | M Phase                                   | -1.11       | 0.099   |                     |                 |
| Cdc25a      | M Phase                                   | -1.20       | 0.105   |                     |                 |
| Stmn1       | M Phase                                   | -1.05       | 0.111   |                     |                 |
| Brca2       | M Phase                                   | 1.86        | 0.222   |                     |                 |
| Nek2        | M Phase                                   | -1.08       | 0.299   |                     |                 |
| Rad21       | M Phase                                   | -1.07       | 0.384   |                     |                 |
| Ran         | M Phase                                   | -1.05       | 0.489   |                     |                 |
| Ccnb1       | M Phase                                   | -1.03       | 0.651   |                     |                 |
| Stag1       | M Phase                                   | -1.02       | 0.821   |                     |                 |
| Smc1a       | M Phase                                   | 1.01        | 0.847   |                     |                 |
| Cdk1        | M Phase                                   | 1.00        | 0.922   |                     |                 |
| Aurkb       | M Phase                                   | 1.00        | 0.934   |                     |                 |
| Gadd45a     | Cell Cycle Checkpoint & Cell Cycle Arrest | -1.13       | 0.020   | ✓                   |                 |
| Casp3       | Cell Cycle Checkpoint & Cell Cycle Arrest | -1.36       | 0.021   | ✓                   |                 |
| Atr         | Cell Cycle Checkpoint & Cell Cycle Arrest | -1.40       | 0.021   | ✓                   |                 |
| Rb1         | Cell Cycle Checkpoint & Cell Cycle Arrest | -1.40       | 0.028   | ✓                   |                 |
| Mad2l1      | Cell Cycle Checkpoint & Cell Cycle Arrest | -1.26       | 0.067   |                     |                 |
| Cdkn2a      | Cell Cycle Checkpoint & Cell Cycle Arrest | -1.26       | 0.079   |                     |                 |
| Dst         | Cell Cycle Checkpoint & Cell Cycle Arrest | -1.27       | 0.095   |                     |                 |
| Notch2      | Cell Cycle Checkpoint & Cell Cycle Arrest | -1.13       | 0.101   |                     |                 |
| Pmp22       | Cell Cycle Checkpoint & Cell Cycle Arrest | -1.14       | 0.150   |                     |                 |
| Tsg101      | Cell Cycle Checkpoint & Cell Cycle Arrest | -1.04       | 0.150   |                     |                 |
| Nbn         | Cell Cycle Checkpoint & Cell Cycle Arrest | -1.05       | 0.162   |                     |                 |
| Hus1        | Cell Cycle Checkpoint & Cell Cycle Arrest | -1.14       | 0.172   |                     |                 |
| Cdkn2b      | Cell Cycle Checkpoint & Cell Cycle Arrest | -1.14       | 0.183   |                     |                 |
| Sfn         | Cell Cycle Checkpoint & Cell Cycle Arrest | -1.06       | 0.188   |                     |                 |
| Rad9a       | Cell Cycle Checkpoint & Cell Cycle Arrest | -1.18       | 0.247   |                     |                 |
| Mdm2        | Cell Cycle Checkpoint & Cell Cycle Arrest | -1.08       | 0.294   |                     |                 |
| Pkd1        | Cell Cycle Checkpoint & Cell Cycle Arrest | -1.10       | 0.349   |                     |                 |
| Cdkn1b      | Cell Cycle Checkpoint & Cell Cycle Arrest | 1.05        | 0.520   |                     |                 |
| Cks1b       | Cell Cycle Checkpoint & Cell Cycle Arrest | 1.04        | 0.600   |                     |                 |
| Ddit3       | Cell Cycle Checkpoint & Cell Cycle Arrest | -1.04       | 0.639   |                     |                 |
| Chek2       | Cell Cycle Checkpoint & Cell Cycle Arrest | 1.05        | 0.771   |                     |                 |
| Cdk5rap1    | Cell Cycle Checkpoint & Cell Cycle Arrest | 1.01        | 0.864   |                     |                 |
| Cdkn1a      | Cell Cycle Checkpoint & Cell Cycle Arrest | 1.01        | 0.901   |                     |                 |

| Gene Symbol | Protein class                         | Fold change | P-Value | Significant P-Value | Relative change |
|-------------|---------------------------------------|-------------|---------|---------------------|-----------------|
| Ccnd1       | Regulation of the Cell Cycle          | -1.30       | 0.008   | ✓                   |                 |
| Abl1        | Regulation of the Cell Cycle          | -1.29       | 0.024   | ✓                   |                 |
| Ccna2       | Regulation of the Cell Cycle          | -1.32       | 0.034   | ✓                   |                 |
| Aurka       | Regulation of the Cell Cycle          | -1.33       | 0.048   | ✓                   |                 |
| Bcl2        | Regulation of the Cell Cycle          | -1.28       | 0.066   |                     |                 |
| Ccnd3       | Regulation of the Cell Cycle          | -1.25       | 0.068   |                     |                 |
| Skp2        | Regulation of the Cell Cycle          | -1.12       | 0.081   |                     |                 |
| E2f2        | Regulation of the Cell Cycle          | 1.12        | 0.082   |                     |                 |
| Ccnd2       | Regulation of the Cell Cycle          | -1.17       | 0.083   |                     |                 |
| E2f3        | Regulation of the Cell Cycle          | -1.16       | 0.132   |                     |                 |
| Ccnf        | Regulation of the Cell Cycle          | -1.11       | 0.135   |                     |                 |
| Ccne1       | Regulation of the Cell Cycle          | -1.21       | 0.138   |                     |                 |
| E2f1        | Regulation of the Cell Cycle          | 1.06        | 0.299   |                     |                 |
| Tfdp1       | Regulation of the Cell Cycle          | -1.12       | 0.322   |                     |                 |
| Ccnb2       | Regulation of the Cell Cycle          | 1.16        | 0.378   |                     |                 |
| E2f4        | Regulation of the Cell Cycle          | -1.17       | 0.422   |                     |                 |
| Cdk4        | Regulation of the Cell Cycle          | -1.54       | 0.864   |                     |                 |
| Ccnc        | Regulation of the Cell Cycle          | -1.01       | 0.925   |                     |                 |
| Atm         | Negative Regulation of the Cell Cycle | -1.43       | 0.024   | ✓                   |                 |
| Trp53       | Negative Regulation of the Cell Cycle | -1.23       | 0.231   |                     |                 |
| Brca1       | Negative Regulation of the Cell Cycle | -1.10       | 0.341   |                     |                 |
| Rbl2        | Negative Regulation of the Cell Cycle | -1.09       | 0.398   |                     |                 |
| Trp63       | Negative Regulation of the Cell Cycle | -1.02       | 0.677   |                     |                 |
| Rbl1        | Negative Regulation of the Cell Cycle | -1.02       | 0.821   |                     |                 |
| Mki67       | Other                                 | -1.37       | 0.015   | ✓                   |                 |
| Msh2        | Other                                 | -1.46       | 0.017   | ✓                   |                 |
| Cdc6        | Other                                 | -1.27       | 0.037   | ✓                   |                 |
| Cdc7        | Other                                 | -1.20       | 0.046   | ✓                   |                 |
| Rad17       | Other                                 | -1.18       | 0.051   |                     |                 |
| Mcm2        | Other                                 | -1.14       | 0.117   |                     |                 |
| Mre11a      | Other                                 | -1.48       | 0.290   |                     |                 |
| Mcm4        | Other                                 | -1.38       | 0.640   |                     |                 |
| Mcm3        | Other                                 | -1.03       | 0.711   |                     |                 |
| Rad51       | Other                                 | -1.02       | 0.792   |                     |                 |
| B2m         | Housekeeping gene                     | -1.22       | 0.0527  |                     |                 |
| Gapdh       | Housekeeping gene                     | -1.07       | 0.175   |                     |                 |
| Gusb        | Housekeeping gene                     | -1.11       | 0.297   |                     |                 |
| Hsp90ab1    | Housekeeping gene                     | -1.06       | 0.447   |                     |                 |
| Actb        | Housekeeping gene                     | -1.05       | 0.487   |                     |                 |
