# Supplementary material for: Long noncoding RNAs are dynamically regulated during β-cell mass expansion in mouse pregnancy and control β-cell proliferation in vitro
Source: PubMed Central journal article supplement (PMC5552087; doi:10.1371/journal.pone.0182371), 2017-08-10
Supplement: pone.0182371.s007.pdf [file pone.0182371.s007.pdf]

## S2 Table. Taqman probes

| <u>LncRNAs and reference gene</u> | <u>Taqman ID</u> |
|-----------------------------------|------------------|
| Lnc01                             | Mm01343153_m1    |
| Lnc02                             | Mm01234921_m1    |
| Lnc03                             | Mm03976287_g1    |
| Lnc04                             | Mm01249971_m1    |
| Lnc05                             | Mm01264868_m1    |
| Lnc06                             | AJT96JB          |
| Hprt                              | Mm00446968_m1    |
