# Supplementary material for: Long noncoding RNAs are dynamically regulated during β-cell mass expansion in mouse pregnancy and control β-cell proliferation in vitro
Source: PubMed Central journal article supplement (PMC5552087; doi:10.1371/journal.pone.0182371), 2017-08-10
Supplement: pone.0182371.s008.pdf [file pone.0182371.s008.pdf]

**S3 Table. SiRNA against Lnc03 sense sequences**

| <u>siRNAs</u> | <u>Sense Sequence</u> |
|---------------|-----------------------|
| SiLnc03#1     | CCAUCCAUGUAGUACAACAtt |
| SiLnc03#3     | CCAUCUGACUUGUGAAGAAtt |
| SiLnc03#4     | GUCCUUUAGUGGAUUCUCAtt |
